# Supplementary material for: Cloning, expression and characterization of metalloproteinase HypZn from Aspergillus niger
Source: PubMed Central journal article supplement (PMC8584677; doi:10.1371/journal.pone.0259809), 2021-11-11
Supplement: pone.0259809.s001.pdf [file pone.0259809.s001.pdf]

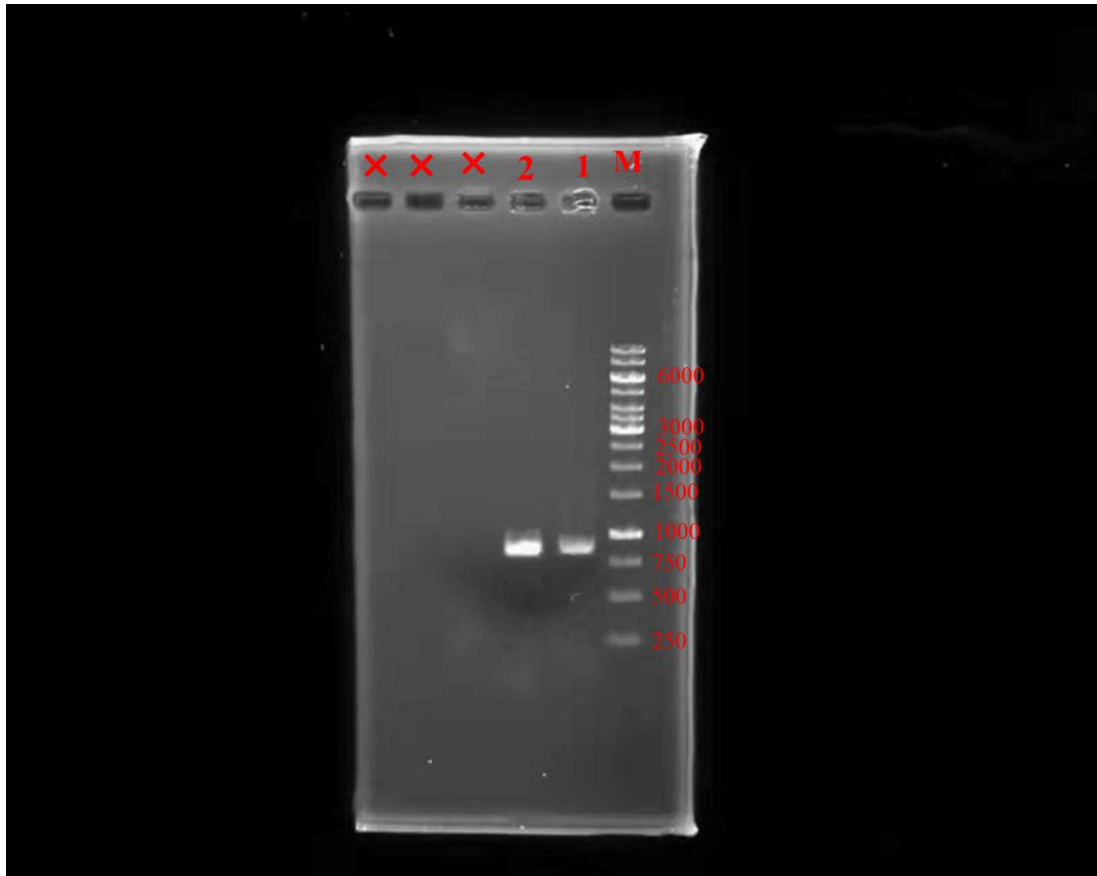

**Fig. 2** was generated from this original image. UV transilluminator was used to capture the image.

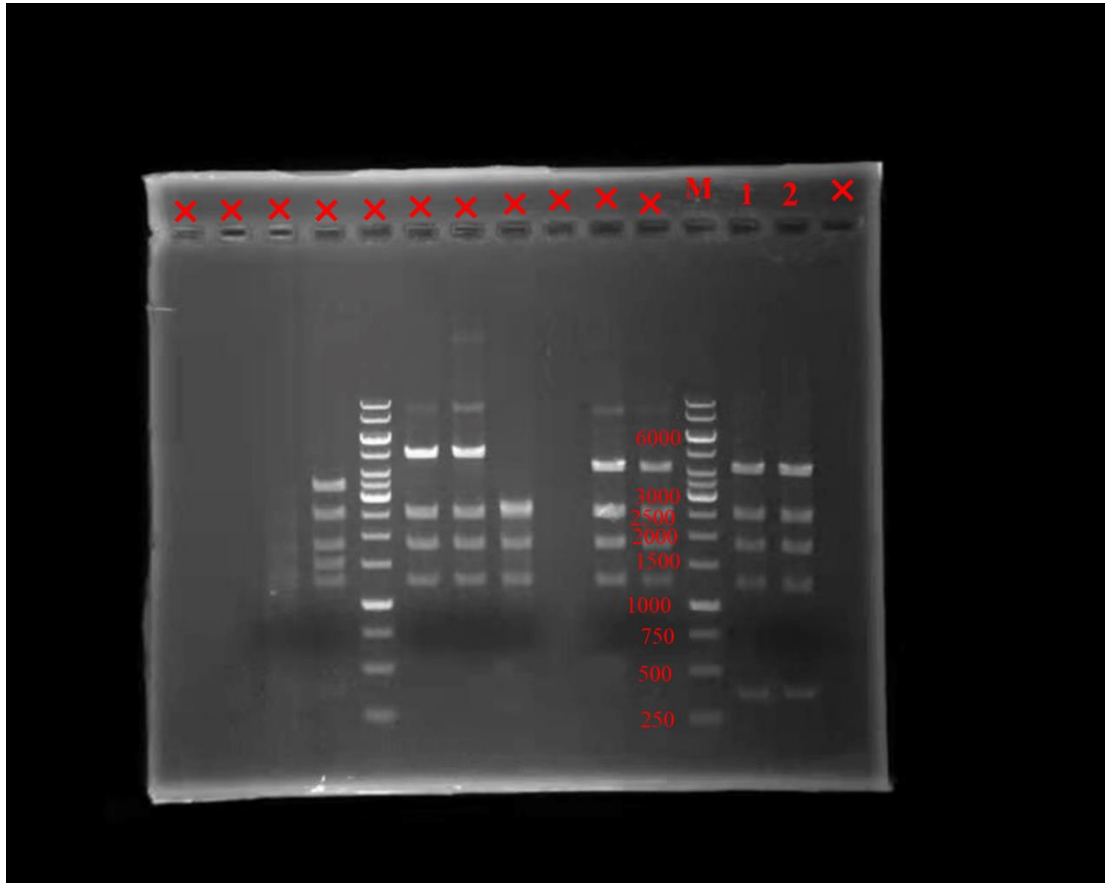

**Fig. 3** was generated from this original image. UV transilluminator was used to capture the image.

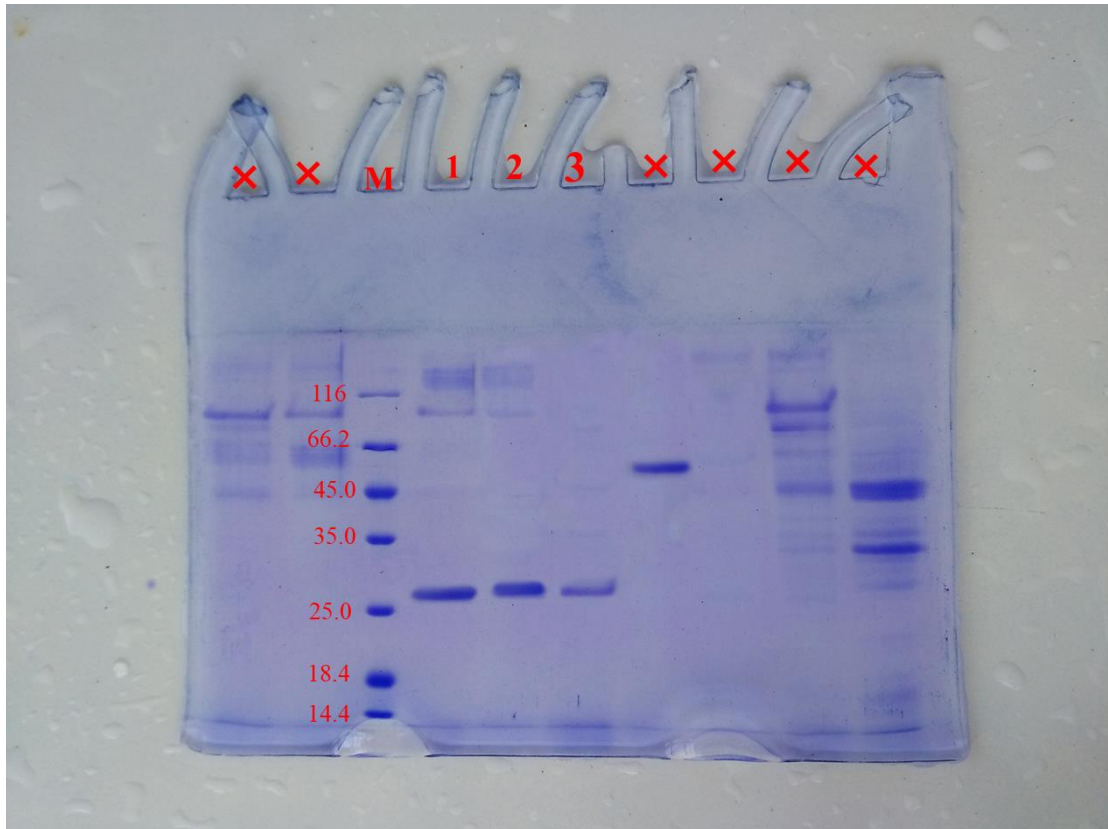

**Fig. 4** was generated from this original image. A phone camera was used to capture the image

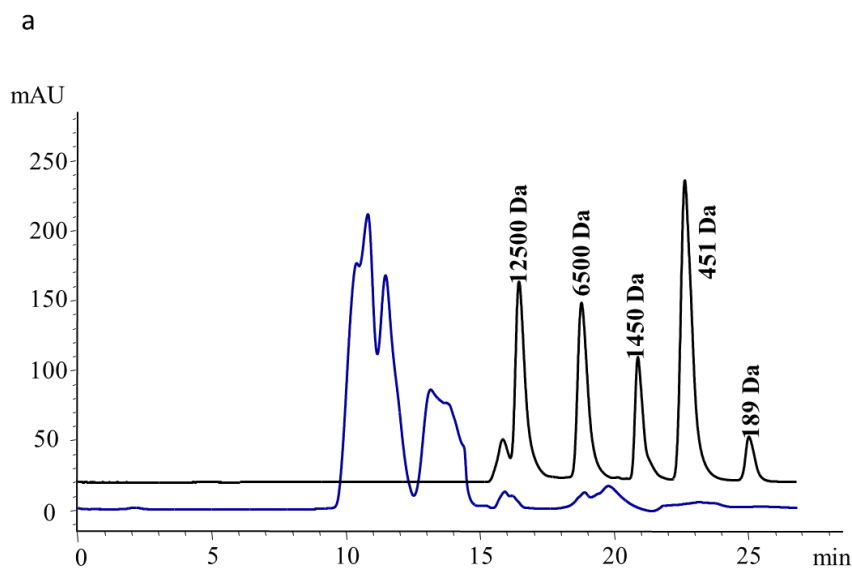

**Fig. 7a** was generated from this original image. The liquid chromatogram (Agilent 1260) was directly exported to Microsoft word from HPLC chemstation, and then the curve was made bold for observation.

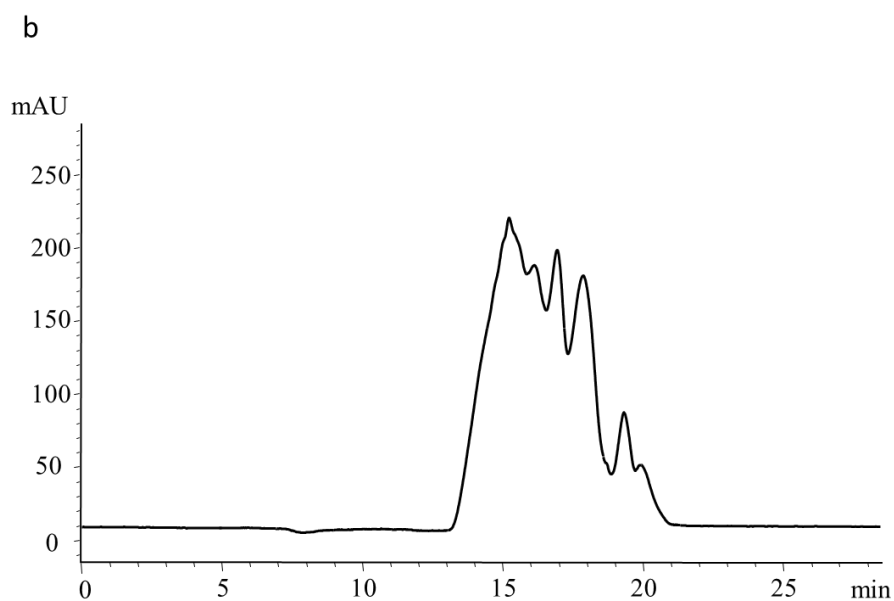

**Fig. 7b** was generated from this original image. The liquid chromatogram (Agilent 1260) was directly exported to Microsoft word from HPLC chemstation, and then the curve was made bold for observation. **Fig. 7b** showed the peak times of approximately 10~25 min (product peaks).

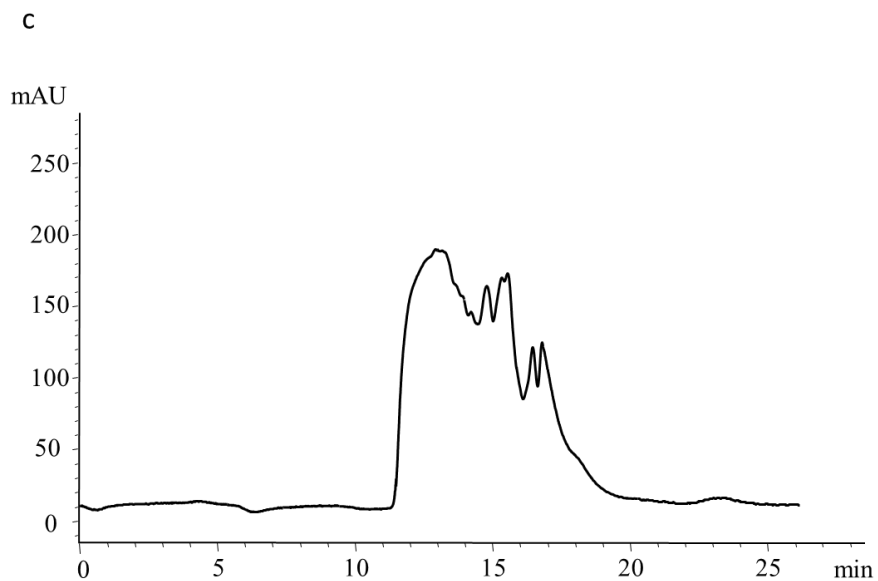

**Fig. 7c** was generated from this original image. The liquid chromatogram (Agilent 1260) was directly exported to Microsoft word from HPLC chemstation, and then the curve was made bold for observation. **Fig. 7c** showed the peak times of approximately 10~25 min (product peaks).

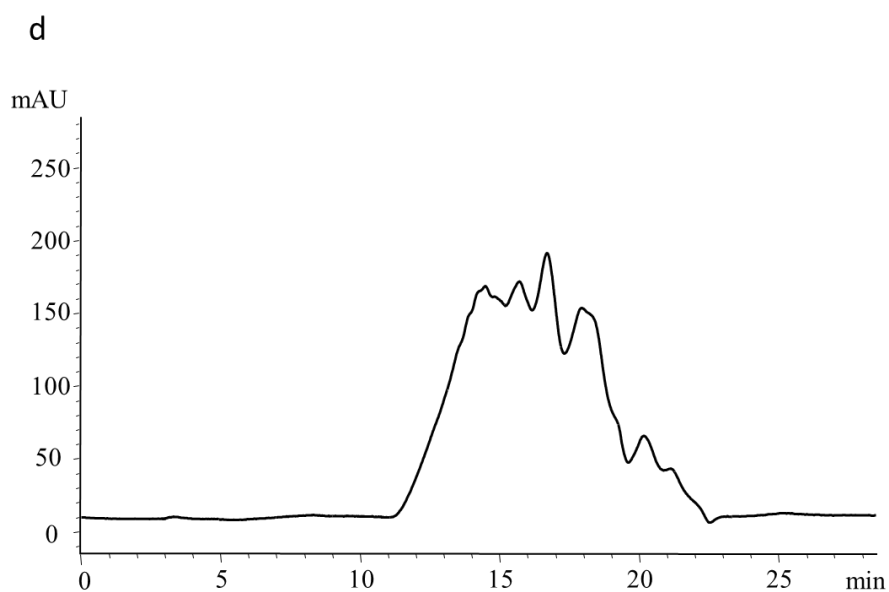

**Fig. 7d** was generated from this original image. The liquid chromatogram (Agilent 1260) was directly exported to Microsoft word from HPLC chemstation, and then the curve was made bold for observation. **Fig. 7d** showed the peak times of approximately 10~25 min (product peaks).

e

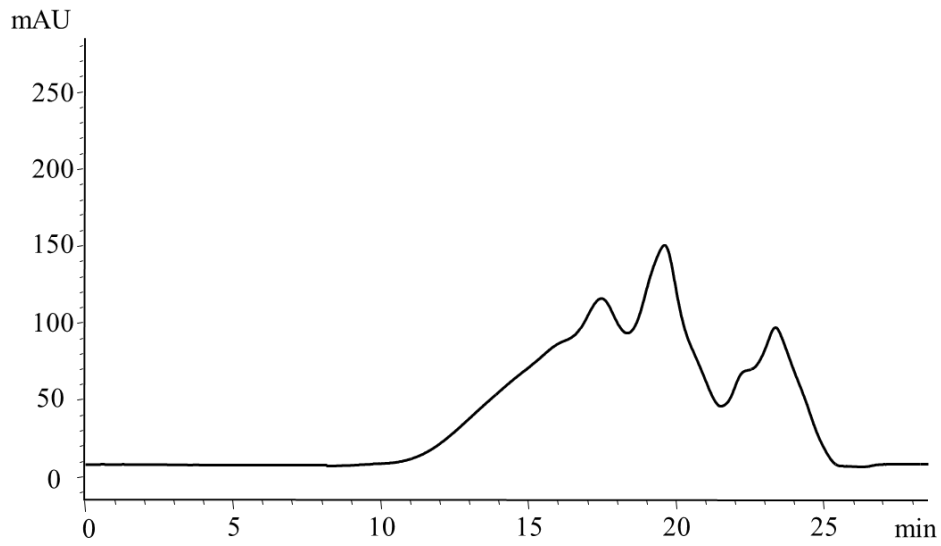

**Fig. 7e** was generated from this original image. The liquid chromatogram (Agilent 1260) was directly exported to Microsoft word from HPLC chemstation, and then the curve was made bold for observation. **Fig. 7e** showed the peak times of approximately 10~25 min (product peaks).

f

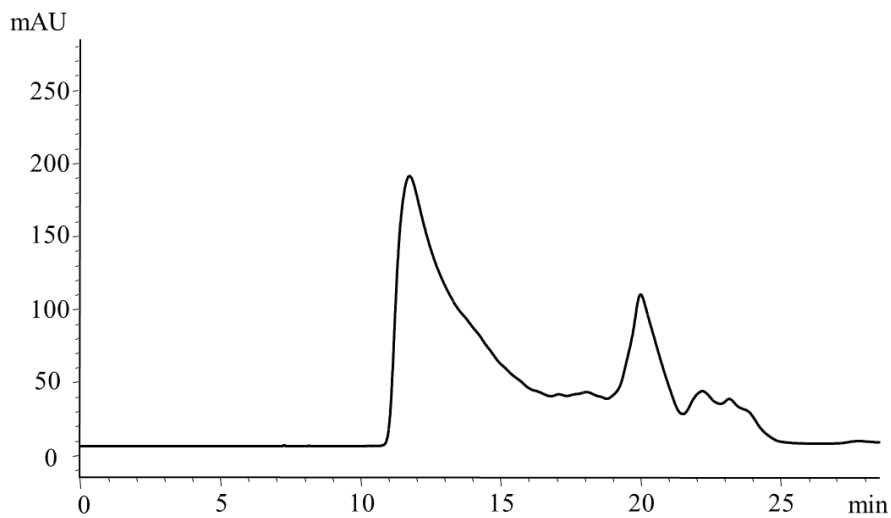

**Fig. 7f** was generated from this original image. The liquid chromatogram (Agilent 1260) was directly exported to Microsoft word from HPLC chemstation, and then the curve was made bold for observation. **Fig. 7f** showed the peak times of approximately 10~25 min.

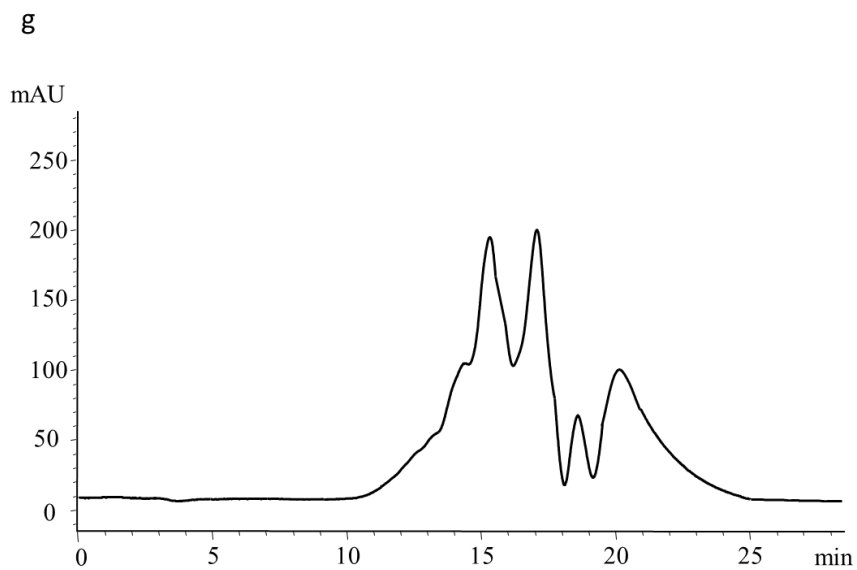

**Fig. 7g** was generated from this original image. The liquid chromatogram (Agilent 1260) was directly exported to Microsoft word from HPLC chemstation, and then the curve was made bold for observation. **Fig. 7g** showed the peak times of approximately 10~25 min (product peaks).
